# Supplementary material
Source: publisher site journal article supplement (https://www.dovepress.com/article/391872)
Supplement: Supplementary file 1 [file get_supplementary_file.php]

**Supplementary Figure S1:** The effects of exosomal circSTAU2 from SGC7901 cells on MKN45 and BGC823 cells. (A) qRT-PCR results of relative expression of circSTAU2 in MKN45 and BGC823 cells after co-incubated with exosomes from SGC7901 cells or PBS. (B-C) CCK8 results of MKN45 and BGC823 cells after co-incubated with exosomes from SGC7901 cells or PBS. Data are expressed as mean  $\pm$  SD. \* $p < 0.05$ .

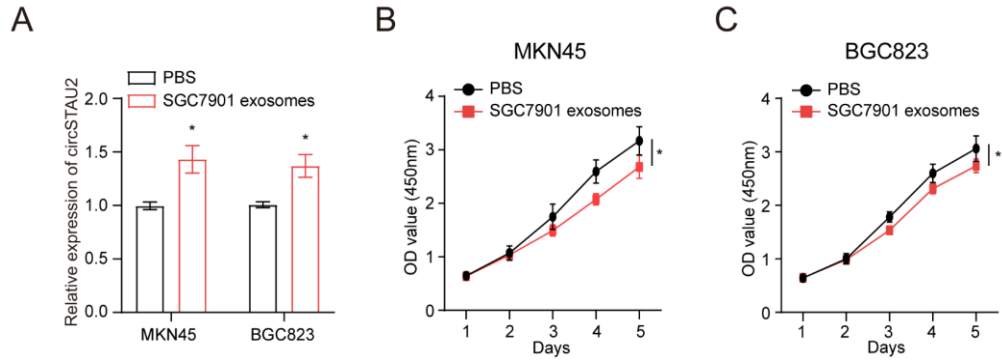

**Supplementary Table S1:** sequences information for gene overexpression and knock down.

|                       | 5'-3'                                                              | 3'-5'                                                              |
|-----------------------|--------------------------------------------------------------------|--------------------------------------------------------------------|
| NC-mimics             | UUUGUACUACACAAAAGU<br>ACUG                                         | AAACAUGAUGUGUUUCA<br>UGAC                                          |
| miR-589-<br>mimics    | UGAGAACCACGUCUGCUC<br>UGAG                                         | ACUCUUGGUGCAGACGAG<br>ACUC                                         |
| NC-inhibitor          | 5'-CAGUACUUUUGUGUAGUACAAA-3'                                       |                                                                    |
| miR-589-<br>inhibitor | 5'-CUCAGAGCAGACGUGGUUCUCA-3'                                       |                                                                    |
|                       |                                                                    |                                                                    |
|                       | Sense (5'-3')                                                      | Antisense (5'-3')                                                  |
| siMBNL1               | GGAUGUUGCAGCUAGUAA<br>AGG                                          | UUUACUAGCUGCAACAUC<br>CAA                                          |
| siKHDRBS3             | AGUCCUGUAUACUGUUCA<br>AAG                                          | UUGAACAGUAUACAGGAC<br>UGG                                          |
| shcircSTAU2           | CCGGACAATCAGAGATGTT<br>CTCAGCTCGAGCTGAGAAC<br>ATCTCTGATTGTTTTTTG   | AATTCAAAAAACAATCAGA<br>GATGTTCTCAGCTCGAGCT<br>GAGAACATCTCTGATTGT   |
| shCAPZA1              | CCGGCCTATGTGAAAGACC<br>ATTATTCTCGAGAATAATGG<br>TCTTTCACATAGGTTTTTG | AATTCAAAAACCTATGTGA<br>AAGACCATTATTCTCGAGA<br>ATAATGGTCTTTCACATAGG |

**Supplementary Table S2:** primers sequences for qRT-PCR.

|                                 | Forward (5'-3')              | Reverse (5'-3')              |
|---------------------------------|------------------------------|------------------------------|
| STAU2                           | AGAGGGCCTGCTCATTCA<br>AA     | GCACTGGGCAATGATACC<br>TCT    |
| CAPZA1                          | GCCGACTTCGATGATCGT<br>GT     | AGTAGCCGAACGTCATTG<br>AATAC  |
| PPP2R2A                         | CATACCAGGTGCATGAAT<br>ACCTC  | GGGTTATGTCTCGCTTTG<br>TGTTT  |
| BZW1                            | AAGAGAGGTTTGACCCT<br>ACTCAG  | CTGCATATCGACGGTAAT<br>CAAGT  |
| YWHAB                           | CATGAAGGCAGTCACAG<br>ACA     | CTCACGGTACTCTTTGCC<br>CAT    |
| PMAIP1                          | ACCAAGCCGGATTTGCG<br>ATT     | ACTTGCACTTGTTCCCTCG<br>TGG   |
| ELOVL5                          | AGTGGTGTATAACCTTGG<br>ACTCA  | ACCAGAGGACACGGATA<br>ATCTTC  |
| MBNL1                           | GCTGTTAGTGTACACCA<br>ATTCG   | AGGCGATTACTCGTCCAT<br>TTTC   |
| KHDRBS3                         | CGCCTGGTGAACCAAGA<br>AATA    | TCTCTCATGGAACCTTTC<br>CCAA   |
| hsa_circ_0001811<br>(circSTAU2) | ACTGAATGGGCTTGCTAT<br>G      | GTGGCTTCTGAACTGGTT<br>T      |
| hsa_circ_0092337                | AACTGTCTCGTCCGTCCT<br>G      | GTCCCGCTTAGCTCATCA<br>C      |
| hsa_circ_0000217                | AACCTGCTGTGGAGTGG<br>GA      | AAGGGAActATAACAAGG<br>AAATGC |
| hsa_circ_0078738                | GACCGTGGAAGTGTTTG<br>ACC     | GACGCATAACCAGATGAC<br>CTA    |
| hsa_circ_0060055                | TGGCTGAGGGTTCTGCTG<br>T      | TGGTCGGTGGTATTGTTG<br>G      |
| hsa_circ_0051258                | AACTTCACCACGGACAA<br>CCTC    | GGGCACCCTTCATCACCA<br>G      |
| miR-589-3p                      | AACAAATGCCGGTTCCC<br>AGA     | TGTCGTGGAGTCGGCAAT<br>TG     |
| miR-182-5p                      | ATCACTTTTGGCAATGGT<br>AGAACT | TATGGTTTTGACGACTGT<br>GTGAT  |
| miR-382-3p                      | ATCCGTGAAGTTGTTTCGT<br>GG    | TATGGTTGTAGAGGACTC<br>CTTGAC |

**Supplementary Table S3:** antibody information used in this study.

| Antibody   | Application         | Cat number | Company                   |
|------------|---------------------|------------|---------------------------|
| CAPZA1     | Western blot        | ab166892   | Abcam                     |
| N-cadherin | Western blot        | 22018-1-AP | Proteintech               |
| E-cadherin | Western blot        | 20874-1-AP | Proteintech               |
| Vimentin   | Western blot        | ab92547    | Abcam                     |
| GAPDH      | Western blot        | 60004-1-Ig | Proteintech               |
| MBNL1      | Immunoprecipitation | 94633      | Cell signaling technology |
| MBNL1      | Immunofluorescent   | 66837-1-Ig | Proteintech               |
| TSG101     | Western blot        | 28283-1-AP | Proteintech               |
